# Supplementary material for: Multi-omics of human plasma reveals molecular features of dysregulated inflammation and accelerated aging in schizophrenia
Source: PubMed Central journal article supplement (PMC9054664; doi:10.1038/s41380-021-01339-z), 2021-11-05
Supplement: 41380_2021_1339_MOESM1_ESM.pdf [file 41380_2021_1339_MOESM1_ESM.pdf]

**Supplemental Figures 1-4 for:**

**Multi-omics of Human Plasma Reveals Molecular Features of Dysregulated Inflammation and Accelerated Aging in Schizophrenia**

Anaamika Campeau<sup>1,2</sup>, Robert H. Mills<sup>1,2</sup>, Toer Stevens<sup>3</sup>, Leigh-Ana Rossitto<sup>1,2</sup>, Michael Meehan<sup>2</sup>, Pieter Dorrestein<sup>1,2</sup>, Rebecca Daly<sup>4,5,6</sup>, Tanya T. Nguyen<sup>4,5,6</sup>, David J. Gonzalez<sup>1,2\*#</sup>, Dilip V. Jeste<sup>4,5,6\*</sup>, Vivian Hook<sup>1,2,6\*</sup>

<sup>1</sup>Department of Pharmacology, University of California, San Diego, California 92093, USA

<sup>2</sup>Skaggs School of Pharmacy and Pharmaceutical Sciences, University of California, San Diego, California 92093, USA

<sup>3</sup> Amsterdam University Medical Centers, University of Amsterdam, Amsterdam, The Netherlands

<sup>4</sup>Sam and Rose Stein Institute for Research on Aging, University of California San Diego, California 92093, USA

<sup>5</sup>Department of Psychiatry, University of California, San Diego, California 92093, USA

<sup>6</sup>Department of Neurosciences, University of California San Diego, California 92093, USA

\*Co-senior authors

#Corresponding author: David J. Gonzalez ([djgonzalez@ucsd.edu](mailto:djgonzalez@ucsd.edu))

**Supplemental Figure 1: Representative clinical variables for SZ subjects and NC subjects**

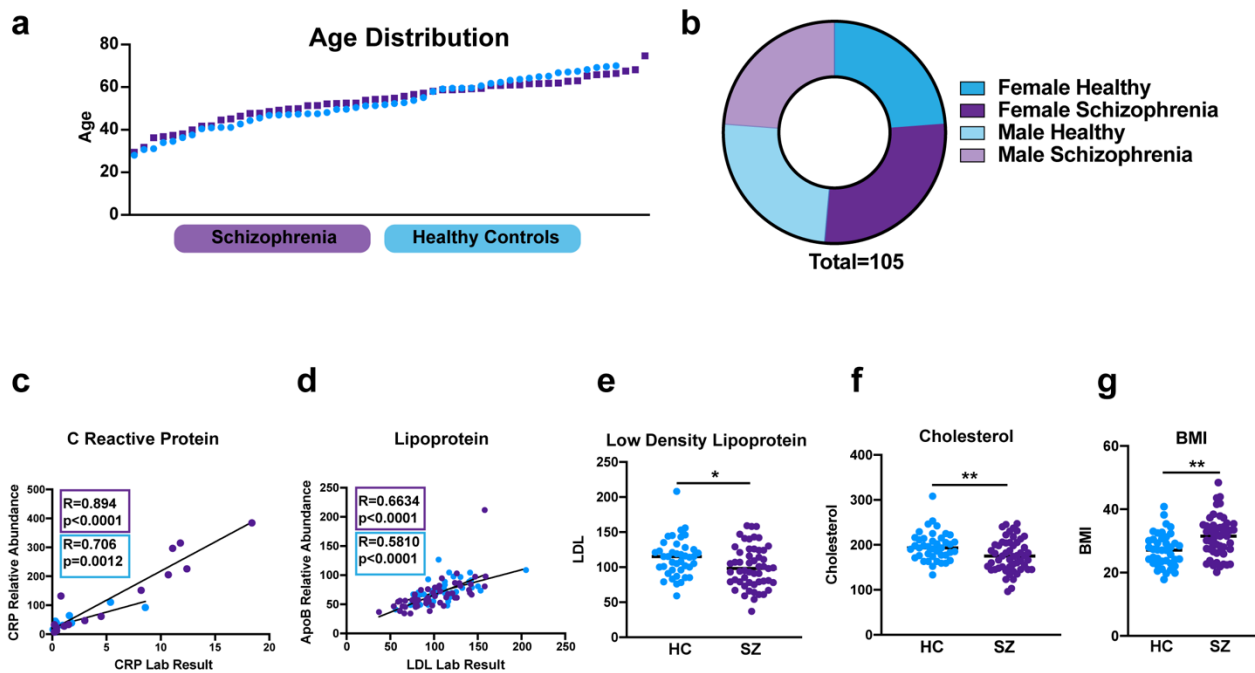

- Age distribution of schizophrenia and healthy control subjects included in study.
- Sex distribution of schizophrenia and healthy control subjects included in study.
- Correlation between hs-CRP measured in the clinical laboratory and CRP relative protein abundance for schizophrenia and healthy control subjects.
- Correlation between LDL measured in the clinical laboratory and ApoB relative protein abundance for schizophrenia and healthy control subjects.
- LDL levels for schizophrenia and healthy control subjects included in study.
- Cholesterol levels for schizophrenia and healthy control subjects included in study.
- BMI measurements for schizophrenia and healthy control subjects included in study.

**Supplemental Figure 2. PCoA analysis of schizophrenia's effect on PTM-enabled proteome data and metabolome data**

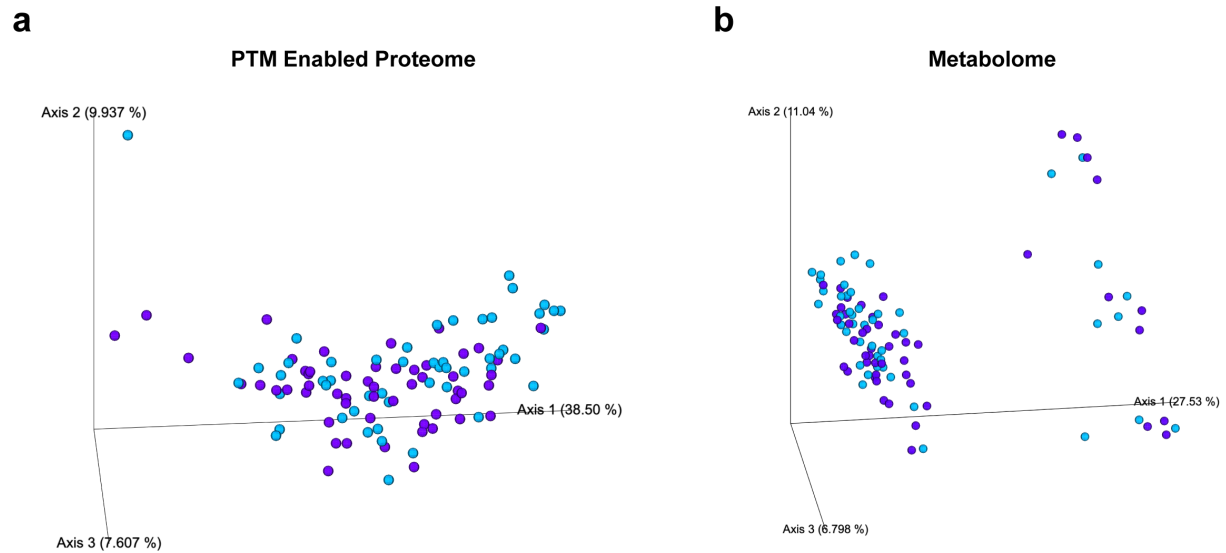

a. PCoA plot of PTM enabled proteome data, with subject data points colored by schizophrenia status (purple: SZ; blue: NC).

b. PCoA plot of metabolome data, with subject data points colored by schizophrenia status (purple: SZ; blue: NC).

### Supplemental Figure 3: Sex-specific circulating proteome changes in schizophrenia

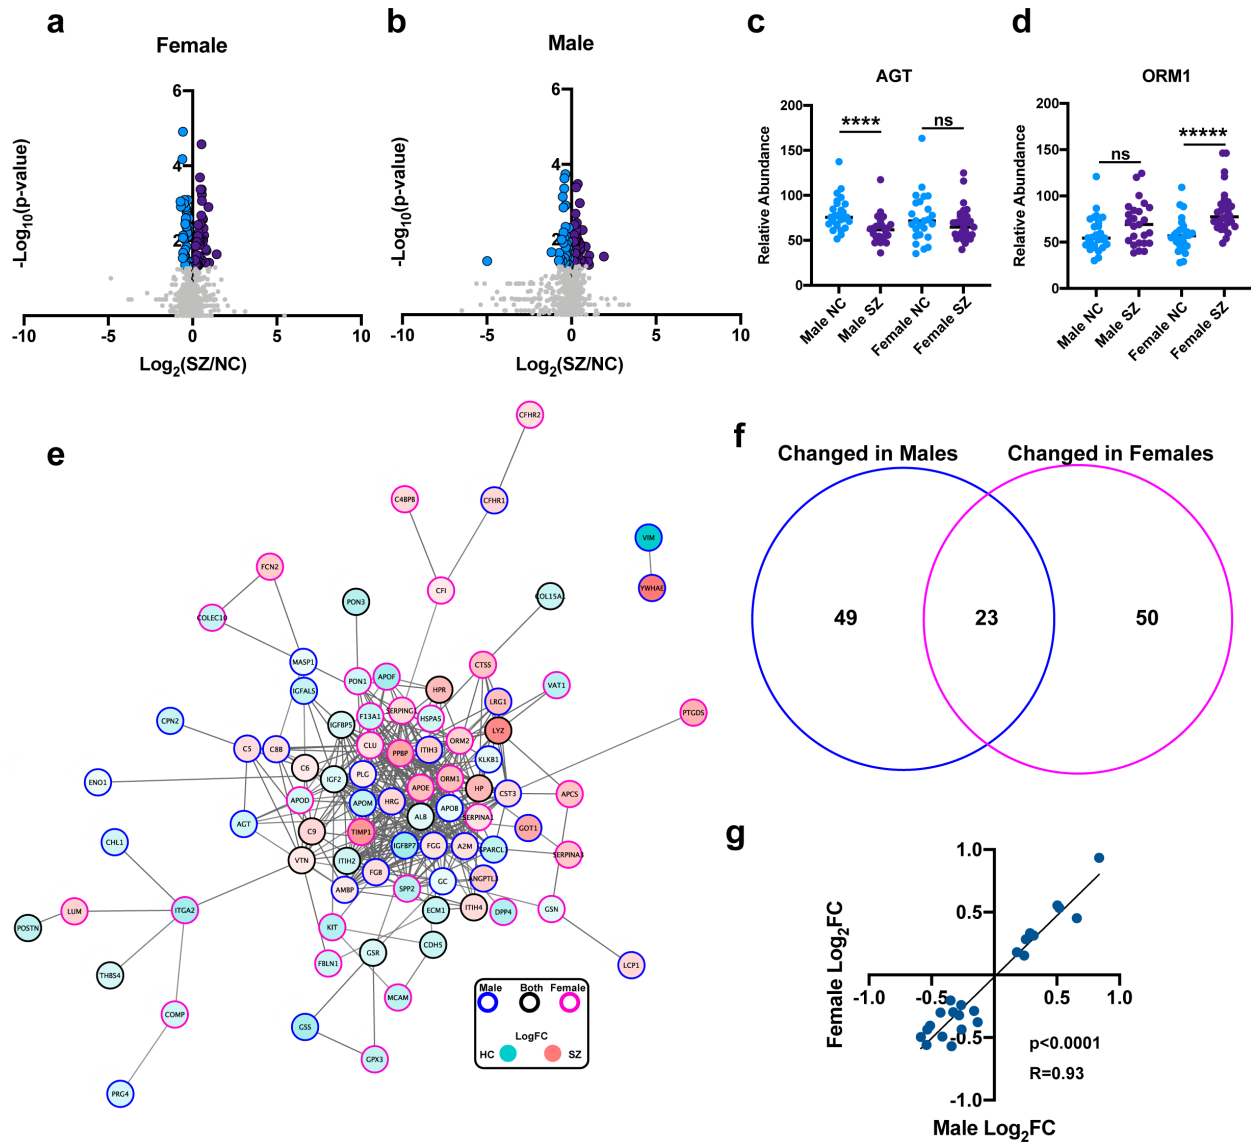

- Volcano plot of significantly altered proteins in schizophrenia compared to healthy controls among females.
- Volcano plot of significantly altered proteins in schizophrenia compared to healthy controls among males.
- AGT, the most significantly altered protein in males that was not significantly altered in females.
- ORM1, the most significantly altered protein in females that was not significantly altered in males.
- String-db network showing interaction-based relationships between significantly altered proteins in males and females.
- Venn diagram showing overlap of protein changes associated with schizophrenia in males and females.
- Correlation of significantly altered proteins identified in both males and females.

**Supplemental Figure 4: Detection of schizophrenia-associated metabolites through spectral networking**

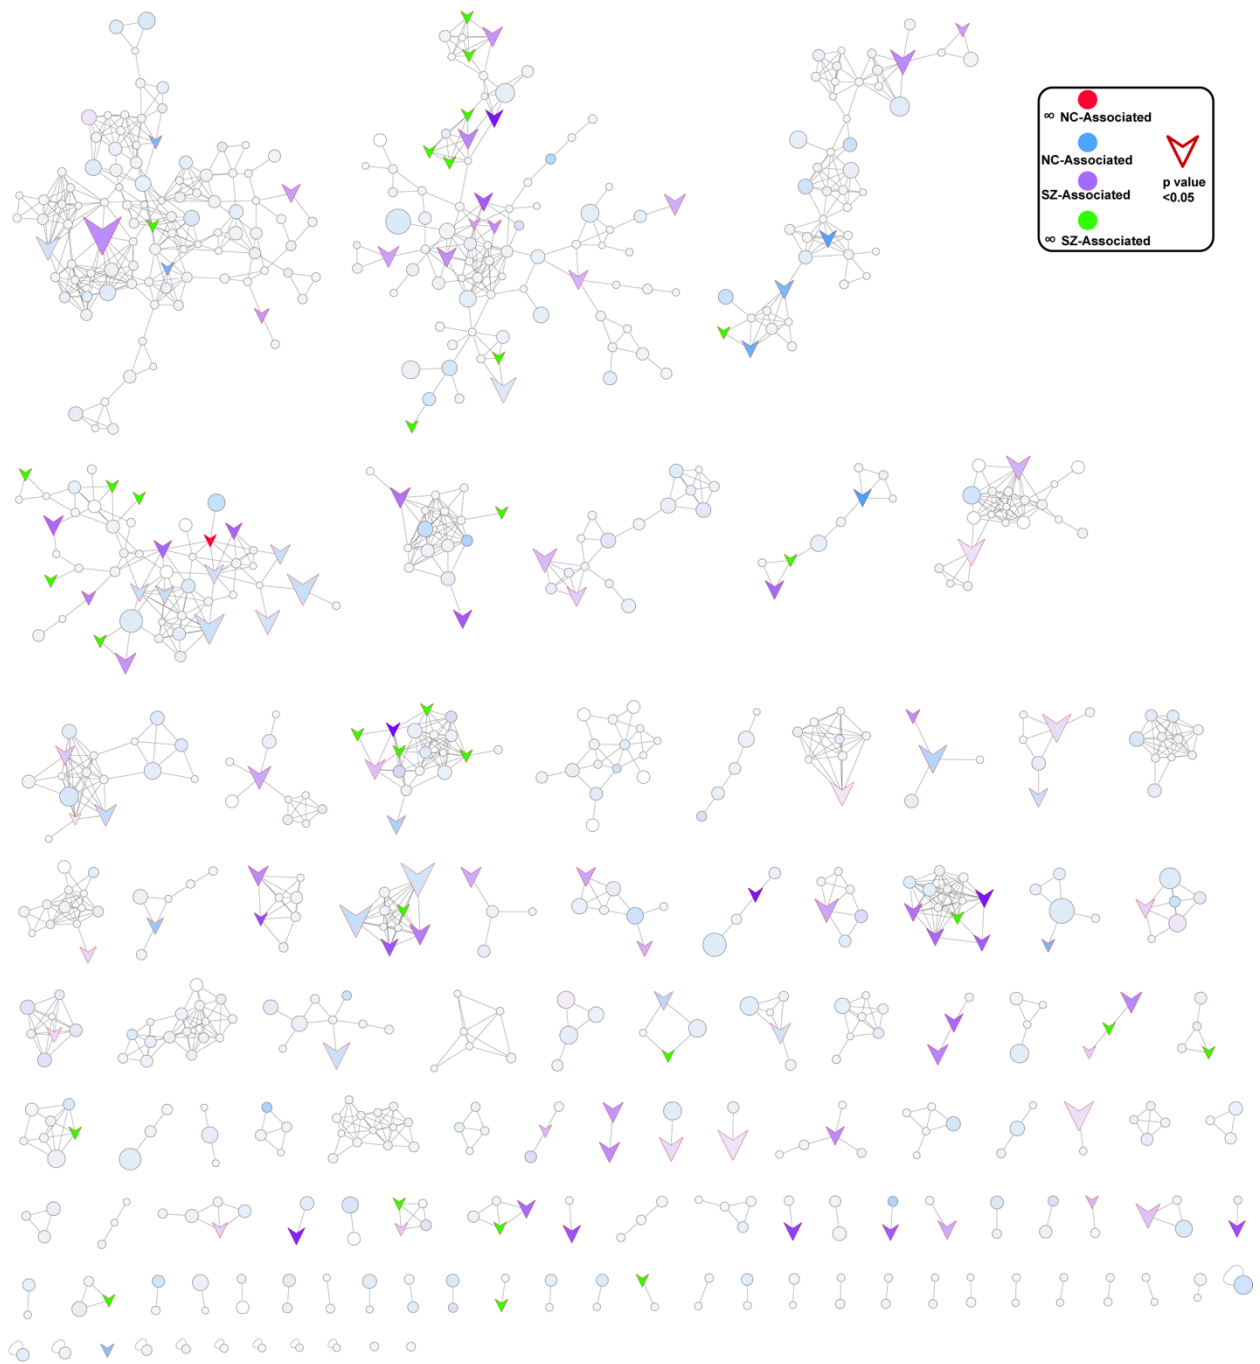

Spectral networking of identified metabolites. Colors are scaled by  $\text{Log}_2(\text{SZ}/\text{NC})$ ; purple=higher in schizophrenia; green=ininitely high in schizophrenia; blue=higher in healthy controls. Nodes are sized by significance. Significantly changed proteins are indicated by arrows.
