# Supplementary material for: Multi-omics of human plasma reveals molecular features of dysregulated inflammation and accelerated aging in schizophrenia
Source: PubMed Central journal article supplement (PMC9054664; doi:10.1038/s41380-021-01339-z), 2021-11-05
Supplement: 41380_2021_1339_MOESM2_ESM.pdf [file 41380_2021_1339_MOESM2_ESM.pdf]

**Supplemental Table 1.**  
**Demographic and Clinical Characteristics of the Sample (N = 105)**

| Variable                                     | HC<br>(n = 51) | SZ<br>(n = 54) | t or F | p-value |
|----------------------------------------------|----------------|----------------|--------|---------|
| <b><i>Sociodemographic Variables</i></b>     |                |                |        |         |
| Age (years)                                  | 52.1 (11.5)    | 53.8 (10.0)    | -0.80  | 0.426   |
| Sex (Female)                                 | 49.0%          | 53.7%          | 0.23   | 0.631   |
| Race                                         |                |                | 1.86   | 0.762   |
| Caucasian                                    | 52.9%          | 51.9%          |        |         |
| African American                             | 9.8%           | 14.8%          |        |         |
| Hispanic                                     | 31.4%          | 27.8%          |        |         |
| Asian                                        | 5.6%           | 3.7%           |        |         |
| Other                                        | 0.0%           | 1.9%           |        |         |
| Education                                    |                |                | 37.26  | <0.001  |
| High School or Below                         | 4.1%           | 61.1%          |        |         |
| Bachelor's Degree                            | 85.7%          | 35.2%          |        |         |
| Graduate Degree                              | 10.2%          | 3.7%           |        |         |
| <b><i>Physical Health</i></b>                |                |                |        |         |
| Smoker (current)                             | 0.0%           | 55.6%          | 26.40  | <0.001  |
| Substance use at baseline (current)          | 11.1%          | 48.1%          | 15.66  | <0.001  |
| Alcohol abuse at baseline (current)          | 22.0%          | 44.4%          | 5.86   | <0.05   |
| Antipsychotic medications (currently taking) | 0.0%           | 90.7%          | 86.77  | <0.001  |
| Comorbidity (CIRS-G)                         | 1.9 (2.4)      | 6.2 (4.4)      | -6.05  | <0.001  |
| Physical well-being (MOS-36)                 | 52.7 (7.8)     | 45.4 (9.7)     | 3.98   | <0.001  |
| <b><i>Mental Health</i></b>                  |                |                |        |         |
| Mental well-being (MOS-36)                   | 53.7 (6.1)     | 43.4 (11.8)    | 5.35   | <0.001  |
| <b><i>Psychopathology</i></b>                |                |                |        |         |
| Positive symptoms (SAPS)                     | 0.4 (1.1)      | 5.9 (3.7)      | -10.38 | <0.001  |
| Negative symptoms (SANS)                     | 1.0 (1.2)      | 6.2 (4.2)      | -8.56  | <0.001  |
| Depression (CDRS)                            | 0.8 (1.8)      | 2.6 (3.3)      | -3.49  | <0.01   |
| Anxiety (BSIA)                               | 1.4 (2.3)      | 6.8 (6.1)      | -5.72  | <0.001  |

Data are presented as mean (standard deviation) for continuous variables or percent for categorical variables.

BSIA = Brief Symptom Inventory Anxiety Subscale; CDRS = Calgary Depression Scale; CIRS-G = Cumulative Illness Rating Scale for Geriatrics; MOS-36 = Medical Outcomes Survey Short Form; SANS = Scale for the Assessment of Negative Symptoms; SAPS = Scale for the Assessment of Positive Symptoms
